# Supplementary material for: Improving the physical, mechanical and energetic properties of Quercus spp. wood pellets by adding pine sawdust
Source: PeerJ. 2020 Aug 20;8:e9766. doi: 10.7717/peerj.9766 (PMC7443319; doi:10.7717/peerj.9766)
Supplement: Supplemental Information 1 — The physical, mechanical and energetic properties of improved oak pellets by adding pine sawdust. [file peerj-08-9766-s001.xlsx]

## Sheet: mechanical_properties
species	mixtures	repetitions	total_weight(g)	long(mm)	diameter(mm)	number_pieces	weight_pieces(g)	particle_density(kgm-3)	hardness(%)	IRI
sideroxyla	100	1	0.6809	21.3	5.8	1	0.6644	1209.92	97.5767	200
sideroxyla	100	2	0.865	24	5.9	1	0.8551	1318.29	98.8555	200
sideroxyla	100	3	0.8726	26.6	5.9	1	0.869	1199.88	99.5874	200
sideroxyla	100	4	0.7655	23.6	5.8	2	0.4996	1227.68	65.2645	100
sideroxyla	100	5	1.0152	29.1	5.9	2	0.5277	1276.04	51.9799	100
sideroxyla	100	6	0.8684	26.3	5.8	2	0.5811	1249.73	66.9162	100
sideroxyla	100	7	0.8805	25.2	5.9	1	0.8805	1278.01	99.9432	200
sideroxyla	100	8	0.8511	24.1	5.9	2	0.4252	1291.72	49.9589	100
sideroxyla	100	9	0.7772	23.2	5.8	1	0.7748	1267.94	99.6912	200
sideroxyla	100	10	1.067	29.7	6.1	1	1.0435	1229.3	97.7976	200
sideroxyla	100	11	0.80004	24	5.9	2	0.5428	1219.29	67.8466	100
sideroxyla	100	12	0.8496	25	5.9	2	0.5404	1243.02	63.6064	100
sideroxyla	100	13	0.8806	25.2	6	2	0.6307	1235.9	71.6216	100
sideroxyla	100	14	0.7213	21.6	6.1	2	0.5166	1142.65	71.6207	100
sideroxyla	100	15	0.9939	28.8	5.9	1	0.9917	1262.28	99.7786	200
sideroxyla	100	16	0.8635	25.1	5.9	2	0.6915	1258.33	80.0811	100
sideroxyla	100	17	0.8427	26.3	5.9	3	0.3058	1171.99	36.2881	67
sideroxyla	100	18	0.7632	23.3	6	1	0.6803	1158.48	89.1378	200
sideroxyla	100	19	0.4447	24.5	5.8	2	0.3884	686.996	87.3398	100
sideroxyla	100	20	0.5155	25.6	6	2	0.3598	712.189	69.7963	100
sideroxyla	80	1	0.9178	25.5	5.8	2	0.5866	1362.26	63.9137	100
sideroxyla	80	2	0.687	19.8	5.9	2	0.4727	1269.1	68.8064	100
sideroxyla	80	3	0.7425	22.5	5.8	3	0.3378	1249.01	45.4949	67
sideroxyla	80	4	0.8222	23.4	5.9	2	0.4527	1285.19	55.0596	100
sideroxyla	80	5	0.9005	24.7	5.9	3	0.3071	1333.5	34.1033	67
sideroxyla	80	6	0.7896	22.8	5.8	2	0.4464	1310.77	56.535	100
sideroxyla	80	7	0.7161	20.1	5.8	1	0.7158	1348.44	99.9581	200
sideroxyla	80	8	0.8426	23.5	5.8	1	0.8286	1357.08	98.3385	200
sideroxyla	80	9	0.8412	24.7	5.8	3	0.3034	1289.01	36.0675	67
sideroxyla	80	10	0.7901	22.9	5.8	2	0.3861	1305.87	48.8672	100
sideroxyla	80	11	0.7548	22.1	5.8	2	0.4025	1292.69	53.3254	100
sideroxyla	80	12	0.8511	23.7	5.8	3	0.4133	1359.21	48.5607	67
sideroxyla	80	13	0.7781	23.4	5.8	1	0.7446	1258.56	95.6946	200
sideroxyla	80	14	0.7631	22	5.9	2	0.5438	1268.71	71.262	100
sideroxyla	80	15	1.0876	22.3	5.9	2	0.386	1783.9	35.491	100
sideroxyla	80	16	0.6606	19.1	6	2	0.3565	1223.24	53.9661	100
sideroxyla	80	17	0.7896	22.1	5.9	2	0.4853	1306.83	61.4615	100
sideroxyla	80	18	0.8863	25.5	5.8	2	0.6091	1315.51	68.7239	100
sideroxyla	80	19	0.7829	22.5	5.8	2	0.4535	1316.97	57.9257	100
sideroxyla	80	20	0.8583	23.5	5.8	2	0.4566	1382.37	53.1982	100
sideroxyla	60	1	0.7794	21.5	5.9	1	0.7791	1325.95	99.9615	200
sideroxyla	60	2	0.81	22.7	5.9	2	0.4639	1305.16	57.2716	100
sideroxyla	60	3	0.7705	22.7	5.8	3	0.2917	1284.69	37.8585	67
sideroxyla	60	4	0.6247	19.7	5.8	2	0.521	1200.21	83.4	100
sideroxyla	60	5	0.8105	22.6	5.8	1	0.7805	1357.37	96.2986	200
sideroxyla	60	6	0.7531	21.7	5.9	2	0.39	1269.4	51.786	100
sideroxyla	60	7	0.7881	23.6	5.9	2	0.4707	1221.45	59.7259	100
sideroxyla	60	8	0.9285	26.7	5.9	2	0.5442	1271.97	58.6107	100
sideroxyla	60	9	0.7706	22.4	5.9	2	0.401	1258.31	52.0374	100
sideroxyla	60	10	0.9213	27.5	5.8	3	0.3273	1268.01	35.5259	67
sideroxyla	60	11	0.8221	23.1	5.9	3	0.2841	1301.72	34.5578	67
sideroxyla	60	12	0.7178	20.7	5.9	2	0.52	1268.35	72.4436	100
sideroxyla	60	13	0.8044	24.3	5.8	3	0.3588	1252.91	44.6047	67
sideroxyla	60	14	0.8843	24.6	5.8	2	0.5023	1360.56	56.802	100
sideroxyla	60	15	0.9012	25.5	5.8	3	0.4417	1337.62	49.0124	67
sideroxyla	60	16	0.945	27.2	5.9	2	0.7259	1270.77	76.8148	100
sideroxyla	60	17	0.8231	23.6	5.8	1	0.8231	1320.06	100	200
sideroxyla	60	18	0.773	21.8	5.9	2	0.4637	1296.96	59.9871	100
sideroxyla	60	19	0.6768	21.5	5.9	2	0.3711	1151.4	54.8316	100
sideroxyla	60	20	0.9136	25.3	5.9	3	0.2352	1320.81	25.7443	67
sideroxyla	40	1	0.7742	21.2	5.9	1	0.7742	1335.74	100	200
sideroxyla	40	2	0.8499	23	5.9	2	0.4238	1351.59	49.8647	100
sideroxyla	40	3	0.6889	19.1	6	2	0.4265	1275.64	61.9103	100
sideroxyla	40	4	0.8155	22.5	6	3	0.3961	1281.88	48.5714	67
sideroxyla	40	5	0.7682	21.6	5.9	2	0.41	1300.85	53.3715	100
sideroxyla	40	6	0.6976	20.7	5.8	3	0.2917	1275.53	41.8148	67
sideroxyla	40	7	0.702	22.7	5.7	3	0.2697	1211.91	38.4188	67
sideroxyla	40	8	0.745	23.2	5.9	3	0.311	1174.56	41.745	67
sideroxyla	40	9	0.6661	22.1	5.9	2	0.4451	1102.43	66.8218	100
sideroxyla	40	10	0.6866	19.4	6	2	0.3983	1251.72	58.0105	100
sideroxyla	40	11	0.7652	21.7	6	2	0.552	1247.16	72.138	100
sideroxyla	40	12	0.7821	22.4	5.9	3	0.2843	1277.08	36.3509	67
sideroxyla	40	13	0.7366	21.6	6	2	0.3611	1206.1	49.0225	100
sideroxyla	40	14	0.7586	21.5	5.9	3	0.5243	1290.56	69.1142	67
sideroxyla	40	15	0.7709	21.7	5.9	1	0.7709	1299.4	100	200
sideroxyla	40	16	0.7738	24.9	5.5	4	0.27	1308.02	34.8927	50
sideroxyla	40	17	0.749	21.9	5.9	2	0.3776	1250.96	50.4139	100
sideroxyla	40	18	0.7919	23.5	6	3	0.3779	1191.82	47.7207	67
sideroxyla	40	19	0.6664	20.2	5	2	0.343	1680.17	51.4706	100
sideroxyla	40	20	0.8344	24.1	5.9	2	0.6382	1266.38	76.4861	100
sideroxyla	20	1	0.7238	19.5	6	2	0.5789	1312.78	79.9807	100
sideroxyla	20	2	0.7633	21.6	6	2	0.4897	1249.82	64.1556	100
sideroxyla	20	3	0.6823	21.4	5.9	2	0.5121	1166.18	75.055	100
sideroxyla	20	4	0.7337	20.7	6	3	0.3592	1253.59	48.9573	67
sideroxyla	20	5	0.7912	22.2	5.9	2	0.5191	1303.58	65.6092	100
sideroxyla	20	6	0.625	20.3	5.9	4	0.19	1126.13	30.4	50
sideroxyla	20	7	0.7135	20.5	6	2	0.5295	1230.97	74.2116	100
sideroxyla	20	8	0.6995	21	6	2	0.3595	1178.08	51.3939	100
sideroxyla	20	9	0.6186	19.6	6	4	0.1892	1116.25	30.5852	50
sideroxyla	20	10	0.6651	21.5	5.9	2	0.3992	1131.5	60.021	100
sideroxyla	20	11	0.7616	21	6	3	0.3301	1282.67	43.343	67
sideroxyla	20	12	0.8169	25.4	5.9	3	0.1996	1176.36	24.4338	67
sideroxyla	20	13	0.7541	23.2	5.9	3	0.1816	1188.9	24.0817	67
sideroxyla	20	14	0.6729	20.8	6	3	0.2803	1144.18	41.6555	67
sideroxyla	20	15	0.7531	21.6	5.9	3	0.2827	1275.28	37.5382	67
sideroxyla	20	16	0.704	20.4	6	3	0.2797	1220.53	39.7301	67
sideroxyla	20	17	0.7568	22.4	5.9	2	0.2869	1235.77	37.9096	100
sideroxyla	20	18	0.9578	29.2	5.9	4	0.4154	1199.77	43.3702	50
sideroxyla	20	19	0.7251	21.3	5.9	1	0.718	1245.15	99.0208	200
sideroxyla	20	20	0.8214	24.7	5.8	3	0.3834	1258.67	46.6764	67
rugosa	100	1	1.2162	34.6	5.9	2	0.9414	1285.68	77.405	100
rugosa	100	2	1.1412	31.3	5.9	2	0.6514	1333.59	57.0803	100
rugosa	100	3	1.1104	31.3	5.9	2	0.6386	1297.6	57.5108	100
rugosa	100	4	0.9046	24.4	5.9	1	0.9029	1356.04	99.8121	200
rugosa	100	5	1.2247	37	5.8	2	0.924	1252.8	75.447	100
rugosa	100	6	0.9646	31.1	5.8	2	0.5616	1173.92	58.221	100
rugosa	100	7	1.0274	30.9	5.9	2	0.7039	1216.15	68.5128	100
rugosa	100	8	0.8555	25.1	5.8	2	0.5228	1290.03	61.1105	100
rugosa	100	9	1.0563	29.1	5.9	2	0.5534	1327.7	52.3904	100
rugosa	100	10	0.8865	27.1	6	2	0.5938	1156.95	66.9825	100
rugosa	100	11	1.1539	32.6	5.9	1	1.1521	1294.66	99.844	200
rugosa	100	12	1.1683	32.4	5.9	2	0.6313	1318.91	54.0358	100
rugosa	100	13	0.9931	30.6	5.8	2	0.629	1228.36	63.337	100
rugosa	100	14	0.98	28.6	6	2	0.6716	1211.9	68.5306	100
rugosa	100	15	0.9138	25.7	6	2	0.6354	1257.55	69.5338	100
rugosa	100	16	0.832	23.4	6	1	0.8315	1257.52	99.9399	200
rugosa	100	17	0.9255	27.9	6	2	0.5843	1173.22	63.1334	100
rugosa	100	18	1.0825	31.8	5.9	2	0.6325	1245.1	58.4296	100
rugosa	100	19	0.9727	28.7	5.9	2	0.5636	1239.66	57.9418	100
rugosa	100	20	0.8764	21.3	5.9	2	0.5803	1504.97	66.2141	100
rugosa	80	1	0.9123	26.4	5.9	3	0.3741	1263.98	41.0062	67
rugosa	80	2	0.9044	25.1	6	1	0.9009	1274.36	99.613	200
rugosa	80	3	0.8237	21.7	5.9	2	0.466	1388.4	56.574	100
rugosa	80	4	0.8543	26.3	5.9	2	0.5293	1188.12	61.9572	100
rugosa	80	5	0.8397	23.2	5.9	2	0.542	1323.86	64.5469	100
rugosa	80	6	0.947	27.1	6	2	0.6308	1235.91	66.6103	100
rugosa	80	7	0.852	24.1	6	2	0.6941	1250.34	81.4671	100
rugosa	80	8	0.904	25	6	2	0.5542	1278.9	61.3053	100
rugosa	80	9	0.8346	25.1	5.9	3	0.3847	1216.21	46.0939	67
rugosa	80	10	1.012	28	6	2	0.677	1278.29	66.8972	100
rugosa	80	11	0.8858	23.8	5.9	1	0.8858	1361.33	100	200
rugosa	80	12	0.8741	25.3	5.9	2	0.5499	1263.7	62.9104	100
rugosa	80	13	0.8801	24.3	5.9	2	0.6403	1324.74	72.7531	100
rugosa	80	14	0.967	26.9	5.9	2	0.5215	1314.86	53.9297	100
rugosa	80	15	0.8586	24.3	5.9	1	0.8553	1292.38	99.6157	200
rugosa	80	16	0.7847	21.5	6	2	0.5452	1290.84	69.4788	100
rugosa	80	17	0.895	24.4	6	1	0.8949	1297.3	99.9888	200
rugosa	80	18	0.9249	24.9	5.9	2	0.6727	1358.63	72.7322	100
rugosa	80	19	0.786	23.2	5.9	2	0.4032	1239.19	51.2977	100
rugosa	80	20	0.81	22.4	5.9	2	0.5435	1322.64	67.0988	100
rugosa	60	1	0.9482	25.9	6	2	0.6557	1294.81	69.1521	100
rugosa	60	2	0.8158	22.1	5.9	2	0.46	1350.2	56.3864	100
rugosa	60	3	0.9681	25.9	6	2	0.5096	1321.99	52.6392	100
rugosa	60	4	0.7663	20.8	5.9	1	0.7647	1347.54	99.7912	200
rugosa	60	5	0.9118	25.1	6	3	0.3584	1284.79	39.3069	67
rugosa	60	6	0.992	27.5	5.9	3	0.5589	1319.42	56.3407	67
rugosa	60	7	0.9859	26.3	6	2	0.5678	1325.82	57.592	100
rugosa	60	8	0.9307	25.5	6	2	0.6125	1290.85	65.8107	100
rugosa	60	9	0.9423	26.1	6	2	0.7804	1276.9	82.8186	100
rugosa	60	10	0.8019	22.6	6	2	0.5706	1254.93	71.156	100
rugosa	60	11	0.811	22.3	6	2	0.5176	1286.24	63.8224	100
rugosa	60	12	0.9711	27.6	6	3	0.4622	1244.4	47.5955	67
rugosa	60	13	1.0357	28.6	6	4	0.3467	1280.78	33.4749	50
rugosa	60	14	0.9541	26	5.8	2	0.5927	1388.91	62.1214	100
rugosa	60	15	0.8199	22.7	6	3	0.3264	1277.44	39.8097	67
rugosa	60	16	0.9612	26.7	5.9	2	0.674	1316.76	70.1207	100
rugosa	60	17	0.8633	23.8	6	2	0.6337	1282.9	73.4044	100
rugosa	60	18	0.9706	25.6	6	1	0.9706	1340.93	100	200
rugosa	60	19	0.8802	24.3	6	3	0.3991	1281.1	45.342	67
rugosa	60	20	1.0131	26.6	6	2	0.6034	1347.03	59.5598	100
rugosa	40	1	0.7838	25.9	6	3	0.3384	1070.32	43.1743	67
rugosa	40	2	0.9938	28.2	6	3	0.4874	1246.4	49.0441	67
rugosa	40	3	0.8675	25.5	5.9	2	0.5203	1244.33	59.9769	100
rugosa	40	4	1.0085	27.6	6	2	0.6557	1292.33	65.0174	100
rugosa	40	5	0.9231	28.9	5.9	3	0.6184	1168.3	66.9917	67
rugosa	40	6	1.1064	31.4	5.8	4	0.4029	1333.63	36.4154	50
rugosa	40	7	1.0318	28.4	6	2	0.6768	1284.94	65.5941	100
rugosa	40	8	0.879	24.6	6.1	2	0.4794	1222.65	54.5392	100
rugosa	40	9	0.9851	29.5	6	3	0.4297	1181.04	43.6199	67
rugosa	40	10	0.7343	28.5	5.5	2	0.4179	1084.46	56.9113	100
rugosa	40	11	0.9941	27.8	6.1	2	0.4633	1223.59	46.605	100
rugosa	40	12	0.9823	27.7	5.9	2	0.4231	1297.09	43.0724	100
rugosa	40	13	1.017	27.8	6	2	0.6877	1293.85	67.6205	100
rugosa	40	14	0.9637	28.4	6	3	0.3618	1200.14	37.5428	67
rugosa	40	15	1.0275	30	6	4	0.5637	1211.34	54.8613	50
rugosa	40	16	0.8881	24.4	6	3	0.4269	1287.3	48.0689	67
rugosa	40	17	0.957	27.4	6	3	0.448	1235.29	46.813	67
rugosa	40	18	0.8689	23	6.1	3	0.2885	1292.68	33.2029	67
rugosa	40	19	0.9911	28.1	6	2	0.5889	1247.43	59.4188	100
rugosa	40	20	0.8152	24.4	6	3	0.4415	1181.63	54.1585	67
rugosa	20	1	0.7749	23.2	5.9	2	0.5119	1221.69	66.0601	100
rugosa	20	2	0.6991	21.4	5.9	2	0.4008	1194.9	57.3309	100
rugosa	20	3	0.8701	25.7	6	3	0.4444	1197.41	51.0746	67
rugosa	20	4	0.836	24.8	6	2	0.4573	1192.23	54.701	100
rugosa	20	5	0.6841	21.4	6	3	0.2666	1130.61	38.9709	67
rugosa	20	6	0.7744	24.5	6	2	0.4202	1117.91	54.2614	100
rugosa	20	7	0.6885	21	5.9	2	0.5025	1199.19	72.9847	100
rugosa	20	8	0.8447	24	6.1	3	0.3953	1204.32	46.7977	67
rugosa	20	9	0.9049	26.8	6	2	0.7008	1194.19	77.445	100
rugosa	20	10	0.9176	26.2	6	2	0.568	1238.68	61.9006	100
rugosa	20	11	0.7616	23.8	5.8	2	0.4346	1211.16	57.0641	100
rugosa	20	12	0.7213	22.8	6	3	0.2806	1118.89	38.902	67
rugosa	20	13	0.9054	28	6.1	3	0.2714	1106.45	29.9757	67
rugosa	20	14	0.8975	25.7	6.1	3	0.452	1194.95	50.3621	67
rugosa	20	15	0.6967	20.6	6	3	0.3187	1196.15	45.7442	67
rugosa	20	16	0.7239	21.2	5.8	2	0.4812	1292.4	66.4733	100
rugosa	20	17	0.7502	22.1	6	2	0.4434	1200.58	59.1042	100
rugosa	20	18	0.8088	22.7	6.1	3	0.2523	1219.17	31.1944	67
rugosa	20	19	0.6904	21.8	5.8	3	0.3402	1198.66	49.2758	67
rugosa	20	20	0.7684	22.6	6.1	2	0.3343	1163.4	43.506	100
laeta	100	1	1.1297	33.1	5.9	3	0.5852	1248.36	51.8014	67
laeta	100	2	1.1539	33.3	6	2	0.7247	1225.55	62.8044	100
laeta	100	3	1.0175	35	5.8	3	0.6904	1100.32	67.8526	67
laeta	100	4	1.0934	30.9	5.9	2	0.565	1294.27	51.6737	100
laeta	100	5	0.9353	28.3	5.8	2	0.5764	1250.89	61.6273	100
laeta	100	6	0.9195	28.7	5.7	2	0.539	1255.54	58.6188	100
laeta	100	7	1.1383	31.9	5.9	2	0.7417	1305.18	65.1586	100
laeta	100	8	0.9264	29	5.9	1	0.9244	1168.44	99.7841	200
laeta	100	9	1.0171	32.2	5.8	2	0.5687	1195.53	55.9139	100
laeta	100	10	1.0603	29	6.1	2	0.5456	1251.07	51.4571	100
laeta	100	11	0.9291	28.3	5.9	3	0.4424	1200.83	47.616	67
laeta	100	12	0.9728	27.2	6	1	0.9685	1264.91	99.558	200
laeta	100	13	0.9732	29.9	5.9	2	0.5815	1190.52	59.7513	100
laeta	100	14	0.949	27.7	5.9	2	0.6308	1253.12	66.47	100
laeta	100	15	0.8786	24.1	5.9	1	0.8783	1333.46	99.9659	200
laeta	100	16	1.0639	30	6	2	0.6191	1254.26	58.1916	100
laeta	100	17	0.8451	26.6	5.8	3	0.4388	1202.48	51.9228	67
laeta	100	18	0.8718	25.5	5.8	1	0.8651	1293.99	99.2315	200
laeta	100	19	1.0592	32.5	5.9	2	0.665	1192.06	62.7832	100
laeta	100	20	0.853	26	5.8	2	0.5891	1241.73	69.0621	100
laeta	80	1	0.9541	26.6	6	1	0.954	1268.58	99.9895	200
laeta	80	2	1.0169	29	5.9	3	0.447	1282.58	43.9571	67
laeta	80	3	0.9165	27.7	5.9	3	0.6425	1210.2	70.1037	67
laeta	80	4	0.9849	27.7	5.9	3	0.4539	1300.52	46.0859	67
laeta	80	5	0.9636	28.5	5.9	2	0.5013	1236.68	52.0237	100
laeta	80	6	1.1093	30.6	5.9	2	0.8103	1325.97	73.0461	100
laeta	80	7	1.05	30.5	5.8	2	0.8076	1302.99	76.9143	100
laeta	80	8	1.0475	31.9	5.9	1	1.0466	1201.07	99.9141	200
laeta	80	9	0.9884	26.5	5.9	2	0.648	1364.24	65.5605	100
laeta	80	10	1.2137	34.3	5.9	2	0.6178	1294.26	50.9022	100
laeta	80	11	1.121	32	6	2	0.6055	1238.97	54.0143	100
laeta	80	12	1.1114	30.4	5.9	2	0.5868	1337.22	52.7983	100
laeta	80	13	1.1831	32.9	5.9	1	1.1727	1315.32	99.121	200
laeta	80	14	1.1917	34.2	5.8	2	0.5981	1318.85	50.1888	100
laeta	80	15	1.9874	29.7	5.9	2	0.7856	1447.56	39.529	100
laeta	80	16	1.0636	30.9	5.8	2	0.56	1302.79	52.6514	100
laeta	80	17	1.147	32.9	5.9	2	0.7683	1275.18	66.9834	100
laeta	80	18	1.2189	34.2	5.9	4	0.4389	1303.61	36.0079	50
laeta	80	19	1.1791	32.4	5.9	3	0.4751	1331.1	40.2934	67
laeta	80	20	1.096	30.3	5.9	2	0.6555	1323.04	59.8084	100
laeta	60	1	0.9183	25.6	5.9	2	0.6142	1312.05	66.8845	100
laeta	60	2	0.8946	25	5.9	2	0.4701	1308.86	52.5486	100
laeta	60	3	0.9826	26.7	5.9	2	0.5203	1346.08	52.9514	100
laeta	60	4	0.8947	24.9	6	1	0.8875	1270.82	99.1953	200
laeta	60	5	1.0149	27.9	6	1	1.0036	1286.55	98.8866	200
laeta	60	6	0.9151	26.8	6	3	0.4411	1207.65	48.2024	67
laeta	60	7	0.9025	26.6	5.9	3	0.3815	1241	42.2715	67
laeta	60	8	0.8946	25.4	5.9	1	0.8929	1288.25	99.81	200
laeta	60	9	0.8505	24.6	5.9	1	0.8488	1264.57	99.8001	200
laeta	60	10	0.8005	25.3	6	2	0.5744	1119.04	71.7552	100
laeta	60	11	0.7888	23.3	5.8	3	0.2568	1281.34	32.5558	67
laeta	60	12	0.7977	23.9	5.9	2	0.4863	1220.81	60.9628	100
laeta	60	13	0.8492	25.9	5.7	3	0.4046	1284.9	47.6448	67
laeta	60	14	0.7691	24	5.9	2	0.656	1172.13	85.2945	100
laeta	60	15	0.8066	25.5	5.9	1	0.8065	1156.97	99.9876	200
laeta	60	16	1.0514	28.7	6	2	0.7599	1295.66	72.2751	100
laeta	60	17	0.9565	26.7	5.9	1	0.9555	1310.32	99.8955	200
laeta	60	18	1.0264	28.4	5.9	2	0.7881	1321.91	76.7829	100
laeta	60	19	1.043	28.8	5.9	2	0.5456	1324.64	52.3106	100
laeta	60	20	0.8887	26	5.9	2	0.5615	1250.22	63.1822	100
laeta	40	1	0.9658	26.5	5.9	2	0.5344	1333.05	55.3324	100
laeta	40	2	0.8316	24.7	5.8	3	0.4027	1274.3	48.4247	67
laeta	40	3	0.8716	24.1	5.9	2	0.6264	1322.83	71.8678	100
laeta	40	4	0.8099	22.5	5.8	2	0.5061	1362.39	62.4892	100
laeta	40	5	0.8566	24.3	5.9	2	0.5489	1289.37	64.0789	100
laeta	40	6	0.9017	25.6	5.9	1	0.9017	1288.33	100	200
laeta	40	7	0.9056	24.9	5.8	2	0.608	1376.54	67.1378	100
laeta	40	8	0.7852	24.7	6	3	0.4911	1124.32	62.5446	67
laeta	40	9	0.692	23.3	5.6	2	0.5356	1205.82	77.3988	100
laeta	40	10	0.7834	23.8	5.9	2	0.3991	1203.96	50.9446	100
laeta	40	11	0.8866	25.3	5.9	1	0.8833	1281.78	99.6278	200
laeta	40	12	0.9253	24.9	6	2	0.4775	1314.29	51.6049	100
laeta	40	13	0.8171	23.4	5.9	2	0.4466	1277.22	54.6567	100
laeta	40	14	0.7989	23.2	5.9	2	0.4124	1259.53	51.621	100
laeta	40	15	0.7411	21.7	5.9	2	0.4504	1249.17	60.7745	100
laeta	40	16	0.6487	19.6	5.8	2	0.3993	1252.68	61.5539	100
laeta	40	17	0.8881	25.9	5.9	1	0.8402	1254.2	94.6065	200
laeta	40	18	0.7071	20.4	5.8	1	0.6658	1311.91	94.1592	200
laeta	40	19	0.8056	22.7	5.9	3	0.7476	1298.07	92.8004	67
laeta	40	20	0.8342	23.9	5.9	2	0.5841	1276.67	70.0192	100
laeta	20	1	0.8075	23.2	5.9	3	0.2895	1273.09	35.8514	67
laeta	20	2	0.8691	25.1	5.8	2	0.5461	1310.54	62.8351	100
laeta	20	3	0.9349	26.7	5.8	2	0.6684	1325.28	71.4943	100
laeta	20	4	0.8584	23.1	5.8	3	0.328	1406.47	38.2106	67
laeta	20	5	0.8999	24.2	5.8	3	0.3405	1407.45	37.8375	67
laeta	20	6	0.9262	25.5	5.9	3	0.395	1328.52	42.6474	67
laeta	20	7	1.0034	28.5	5.8	3	0.3101	1332.55	30.9049	67
laeta	20	8	0.8292	24	5.9	2	0.4507	1263.73	54.3536	100
laeta	20	9	0.8099	23	5.9	3	0.2757	1287.98	34.0412	67
laeta	20	10	0.7682	22.7	5.8	3	0.3142	1280.86	40.9008	67
laeta	20	11	1.043	28.7	5.9	2	0.7154	1329.25	68.5906	100
laeta	20	12	0.8796	28.4	5.8	2	0.641	1172.25	72.874	100
laeta	20	13	0.7476	23.1	5.8	2	0.3861	1224.93	51.6453	100
laeta	20	14	0.7832	23.5	5.8	2	0.4105	1261.41	52.4132	100
laeta	20	15	0.8196	23.9	5.8	3	0.3444	1297.95	42.0205	67
laeta	20	16	0.7056	23.8	5.8	3	0.3153	1122.11	44.6854	67
laeta	20	17	0.8317	23.1	5.8	4	0.3585	1362.72	43.1045	50
laeta	20	18	0.968	28.2	5.8	2	0.538	1299.21	55.5785	100
laeta	20	19	0.7721	25	5.7	3	0.3595	1210.3	46.5613	67
laeta	20	20	0.9127	27.6	5.8	2	0.551	1251.62	60.3703	100
conzattii	100	1	1.0472	32.8	5.9	2	0.6187	1167.78	59.0814	100
conzattii	100	2	1.1296	32.8	5.9	2	0.7106	1259.67	62.9072	100
conzattii	100	3	1.0791	34.5	5.9	3	0.4584	1144.06	42.4798	67
conzattii	100	4	1.1105	34.9	5.9	1	1.1084	1163.85	99.8109	200
conzattii	100	5	1.234	37	5.9	1	1.2314	1219.88	99.7893	200
conzattii	100	6	1.131	31.6	5.9	2	0.7548	1309.12	66.7374	100
conzattii	100	7	0.9762	31.1	5.9	2	0.6132	1148.11	62.815	100
conzattii	100	8	1.2275	32.8	5.9	2	0.7486	1368.84	60.9857	100
conzattii	100	9	1.0576	31.3	5.9	2	0.7644	1235.9	72.2769	100
conzattii	100	10	1.1647	34.4	5.8	2	1.0635	1281.47	91.3111	100
conzattii	100	11	1.2021	35.5	6	2	0.9157	1197.62	76.175	100
conzattii	100	12	1.0229	30.4	5.9	2	0.5501	1230.74	53.7785	100
conzattii	100	13	1.1103	31.6	5.9	2	0.7269	1285.16	65.4688	100
conzattii	100	14	0.8332	24.7	5.9	2	0.5534	1233.84	66.4186	100
conzattii	100	15	0.9807	31.8	5.9	2	0.6518	1128.01	66.4627	100
conzattii	100	16	0.9028	27.8	6	2	0.5345	1148.56	59.2047	100
conzattii	100	17	1.2217	34.3	5.9	2	0.9321	1302.79	76.2953	100
conzattii	100	18	1.2052	34.1	5.9	2	0.7093	1292.74	58.8533	100
conzattii	100	19	1.1914	34.8	5.8	1	1.1906	1295.78	99.9329	200
conzattii	100	20	1.0274	31.7	5.8	2	0.6218	1226.69	60.5217	100
conzattii	80	1	1.0827	30.5	5.9	3	0.5726	1298.41	52.8863	67
conzattii	80	2	1.0666	30.6	5.9	3	0.3594	1274.93	33.6959	67
conzattii	80	3	0.7399	21.8	5.9	2	0.4903	1241.43	66.2657	100
conzattii	80	4	1.1186	31.3	6	4	0.4995	1263.97	44.654	50
conzattii	80	5	0.878	25.3	5.9	2	0.4662	1269.34	53.0979	100
conzattii	80	6	0.7495	21.7	5.9	2	0.4629	1263.33	61.7612	100
conzattii	80	7	0.8437	24.4	5.9	2	0.4649	1264.75	55.1025	100
conzattii	80	8	0.7477	22	5.9	3	0.4107	1243.11	54.9284	67
conzattii	80	9	0.7289	20.5	5.9	2	0.4864	1300.53	66.7307	100
conzattii	80	10	0.8054	23.9	5.9	2	0.41	1232.59	50.9064	100
conzattii	80	11	0.9227	25.5	5.9	2	0.7183	1323.5	77.8476	100
conzattii	80	12	0.881	25	5.9	2	0.7153	1288.96	81.1918	100
conzattii	80	13	0.7895	23.6	5.9	1	0.7849	1223.62	99.4174	200
conzattii	80	14	0.8502	25.1	5.9	1	0.8468	1238.95	99.6001	200
conzattii	80	15	0.8969	26.8	5.9	1	0.8953	1224.09	99.8216	200
conzattii	80	16	0.6514	21.1	5.8	3	0.2723	1168.47	41.8023	67
conzattii	80	17	0.9357	27.8	5.8	2	0.5811	1273.93	62.1032	100
conzattii	80	18	0.9969	27.2	6	2	0.7005	1296.25	70.2678	100
conzattii	80	19	0.8579	23.4	5.9	2	0.4821	1340.99	56.1954	100
conzattii	80	20	0.906	27.4	5.9	2	0.4949	1209.44	54.6247	100
conzattii	60	1	0.8753	25.9	6	2	0.7031	1195.26	80.3267	100
conzattii	60	2	0.7111	21	5.9	1	0.7075	1238.56	99.4937	200
conzattii	60	3	0.7717	22	5.9	2	0.4168	1283.01	54.0106	100
conzattii	60	4	0.7676	23.8	5.8	2	0.4218	1220.71	54.9505	100
conzattii	60	5	1.032	27.8	5.9	1	1.0316	1357.81	99.9612	200
conzattii	60	6	0.6975	19.8	6	2	0.456	1245.91	65.3763	100
conzattii	60	7	0.7609	22.4	5.9	2	0.6895	1242.47	90.6164	100
conzattii	60	8	0.819	24.1	5.9	3	0.3795	1243	46.337	67
conzattii	60	9	0.6486	20.4	5.8	2	0.4951	1203.37	76.3336	100
conzattii	60	10	0.8136	23	5.9	3	0.6857	1293.86	84.2797	67
conzattii	60	11	0.7282	22.7	5.9	1	0.7175	1173.36	98.5306	200
conzattii	60	12	0.6422	20.1	5.8	2	0.3444	1209.28	53.6282	100
conzattii	60	13	0.7056	21	5.9	2	0.4202	1228.98	59.5522	100
conzattii	60	14	0.9335	25.8	5.8	2	0.7367	1369.45	78.9181	100
conzattii	60	15	0.6829	22.2	5.7	1	0.6812	1205.49	99.7511	200
conzattii	60	16	0.7973	23.3	5.9	1	0.7799	1251.62	97.8176	200
conzattii	60	17	0.7797	23	6	2	0.4046	1198.96	51.8918	100
conzattii	60	18	0.7509	20.3	5.9	1	0.7504	1352.98	99.9334	200
conzattii	60	19	0.787	23.5	5.9	3	0.3091	1224.93	39.2757	67
conzattii	60	20	0.8433	25.6	6	2	0.4754	1165.06	56.3738	100
conzattii	40	1	1.0821	29.9	5.9	2	0.9086	1323.74	83.9664	100
conzattii	40	2	1.0349	30.5	5.9	2	0.6845	1241.09	66.1417	100
conzattii	40	3	1.041	30.6	5.9	2	0.6795	1244.33	65.2738	100
conzattii	40	4	0.8445	25.3	5.9	2	0.3779	1220.91	44.7484	100
conzattii	40	5	0.8803	25.7	5.9	1	0.8799	1252.86	99.9546	200
conzattii	40	6	0.8812	25.2	5.9	1	0.8809	1279.02	99.966	200
conzattii	40	7	0.7798	25	5.9	2	0.4447	1140.9	57.0274	100
conzattii	40	8	0.7941	23.7	5.9	2	0.423	1225.55	53.2679	100
conzattii	40	9	0.8712	23.7	5.9	2	0.3444	1344.54	39.5317	100
conzattii	40	10	0.8652	26.4	5.9	1	0.8641	1198.72	99.8729	200
conzattii	40	11	0.8314	24.9	5.9	1	0.8149	1221.28	98.0154	200
conzattii	40	12	0.8413	25.5	5.9	1	0.8404	1206.75	99.893	200
conzattii	40	13	0.8476	25.4	5.9	2	0.5182	1220.57	61.1373	100
conzattii	40	14	0.867	25.3	5.8	2	0.658	1297.03	75.8939	100
conzattii	40	15	0.8519	27.2	5.9	2	0.5514	1145.58	64.7259	100
conzattii	40	16	1.0643	29.6	5.9	2	0.5528	1315.16	51.9402	100
conzattii	40	17	0.9655	28	5.9	2	0.5062	1261.24	52.4288	100
conzattii	40	18	1.0142	28.5	5.9	2	0.8693	1301.62	85.7129	100
conzattii	40	19	0.7084	24.3	5.8	1	0.708	1103.38	99.9435	200
conzattii	40	20	0.8685	25.4	5.9	3	0.4764	1250.67	54.8532	67
conzattii	20	1	0.819	26.5	5.8	1	0.8169	1169.74	99.7436	200
conzattii	20	2	0.9088	27.4	5.9	3	0.3787	1213.17	41.6703	67
conzattii	20	3	0.8536	24.7	5.9	2	0.5767	1264.04	67.5609	100
conzattii	20	4	0.7411	21.6	5.9	2	0.491	1254.95	66.2529	100
conzattii	20	5	0.8369	23.6	5.9	2	0.5022	1297.08	60.0072	100
conzattii	20	6	1.0526	31.6	5.8	1	1.0423	1260.75	99.0215	200
conzattii	20	7	0.9713	27.5	6	2	0.6462	1249.19	66.5294	100
conzattii	20	8	0.8164	24.2	5.9	2	0.4235	1233.94	51.8741	100
conzattii	20	9	0.8703	25.8	5.9	1	0.8691	1233.83	99.8621	200
conzattii	20	10	0.9951	28.2	6	2	0.6356	1248.03	63.873	100
conzattii	20	11	0.7912	23.2	5.9	2	0.5033	1247.39	63.6122	100
conzattii	20	12	0.9139	27.8	6	2	0.5843	1162.68	63.9348	100
conzattii	20	13	0.9677	28.3	5.9	3	0.3675	1250.72	37.9766	67
conzattii	20	14	0.8461	23.6	5.9	2	0.6477	1311.34	76.5512	100
conzattii	20	15	0.9499	26.5	5.9	2	0.5611	1311.1	59.0694	100
conzattii	20	16	1.0525	29.4	5.9	3	0.453	1309.42	43.0404	67
conzattii	20	17	0.9051	26.2	5.9	2	0.6801	1263.57	75.1409	100
conzattii	20	18	0.8601	25.1	6	2	0.4152	1211.94	48.2735	100
conzattii	20	19	0.8939	24.8	6	2	0.452	1274.81	50.5649	100
conzattii	20	20	0.8208	23	5.9	2	0.4428	1305.31	53.9474	100

## Sheet: proximate_analysis
species	mixtures	interaction_species-mixtures	repetitions	moisture_content(%)	volatile_matter(%)	fixed_carbon(%)	ash(%)	calorific_power(MJ-kg-1)	bulk_density(kg-m3)
sideroxyla	100	100s	1	4.17997	89.3959	5.98894	0.435221	19.5148	576.5
sideroxyla	100	100s	2	3.5003	89.4187	6.97543	0.105553	19.3852	595.333
sideroxyla	100	100s	3	3.46827	90.4666	5.49931	0.565868	19.8018	568.333
sideroxyla	80	80s	1	0.903764	93.1182	5.3067	0.671339	19.7423	631.833
sideroxyla	80	80s	2	1.05862	90.5535	7.73991	0.647947	19.6949	624.667
sideroxyla	80	80s	3	1.36686	90.3538	8.17064	0.108722	19.8103	634.333
sideroxyla	60	60s	1	1.32602	93.7059	4.38704	0.581087	19.2933	654.167
sideroxyla	60	60s	2	1.24763	87.8078	10.2929	0.651602	18.9356	657.833
sideroxyla	60	60s	3	1.05767	90.9598	7.40642	0.576147	19.4511	643.667
sideroxyla	40	40s	1	2.05589	92.4879	4.77345	0.682738	19.7687	641.667
sideroxyla	40	40s	2	2.26909	91.2562	5.77542	0.699274	19.7834	649.167
sideroxyla	40	40s	3	2.0343	89.5213	7.86385	0.580537	19.7102	662.167
sideroxyla	20	20s	1	2.69273	89.5539	7.1067	0.646681	19.97	643.5
sideroxyla	20	20s	2	2.41911	92.0748	4.83226	0.673792	19.7509	654.833
sideroxyla	20	20s	3	2.60609	89.066	7.75925	0.568638	19.7112	647.833
rugosa	100	100r	1	3.51734	82.7989	12.9223	0.761515	19.2377	551.833
rugosa	100	100r	2	3.54645	83.4575	12.2762	0.719902	18.9994	563
rugosa	100	100r	3	3.03242	85.7535	10.4676	0.746529	18.9223	557.167
rugosa	80	80r	1	3.38155	86.8065	9.34227	0.469687	19.6844	630.833
rugosa	80	80r	2	3.3	87.4923	8.74002	0.467704	19.5676	659.167
rugosa	80	80r	3	3.16765	88.1556	8.21766	0.459069	19.6306	644.5
rugosa	60	60r	1	3.34833	88.1787	8.00196	0.470986	19.8271	655.667
rugosa	60	60r	2	3.56643	88.2791	7.66716	0.487282	19.8127	650.833
rugosa	60	60r	3	3.23515	87.5307	8.57412	0.660068	19.7771	651.333
rugosa	40	40r	1	3.44793	87.0724	9.0601	0.419577	19.7482	655.833
rugosa	40	40r	2	3.42092	87.6376	8.44863	0.492872	19.7014	658
rugosa	40	40r	3	3.44071	89.3315	6.852	0.375769	19.7538	665.167
rugosa	20	20r	1	2.55747	89.2775	7.63351	0.531522	19.922	648
rugosa	20	20r	2	2.76447	87.7307	8.88087	0.623959	19.8458	638.667
rugosa	20	20r	3	2.63684	90.5572	6.23402	0.571903	19.8142	652.167
laeta	100	100l	1	4.19832	88.6951	7.01698	0.0896404	19.5785	592.167
laeta	100	100l	2	4.43645	86.8826	7.74318	0.937814	19.4989	577.667
laeta	100	100l	3	3.37831	89.7744	6.29559	0.551671	19.1623	544.167
laeta	80	80l	1	3.14906	87.0892	9.29952	0.462214	19.5649	612
laeta	80	80l	2	2.24888	90.5992	6.60081	0.551061	19.5127	616.167
laeta	80	80l	3	2.54542	88.3508	8.5767	0.527113	19.3645	613.833
laeta	60	60l	1	2.63868	88.7236	8.1208	0.516971	19.7737	663.5
laeta	60	60l	2	2.90709	90.1711	6.2314	0.690375	19.7168	672
laeta	60	60l	3	2.44902	90.8619	6.43522	0.253878	19.6798	663.333
laeta	40	40l	1	1.73	92.3432	5.42684	0.500007	19.7933	656.5
laeta	40	40l	2	1.70966	87.7178	9.88526	0.687299	19.8826	652.333
laeta	40	40l	3	1.73653	92.4304	5.36493	0.468157	19.8064	661.333
laeta	20	20l	1	2.30562	96.0926	1.16489	0.436928	19.8328	705.833
laeta	20	20l	2	1.8537	91.4579	6.14582	0.542556	19.8209	697.333
laeta	20	20l	3	6.34873	83.4003	9.6798	0.571154	19.7929	705.833
conzattii	100	100c	1	4.14549	87.2325	8.2568	0.365211	19.3222	584.167
conzattii	100	100c	2	4.28914	86.9443	8.19595	0.570563	19.3147	565.5
conzattii	100	100c	3	3.74177	89.6801	6.03763	0.540469	19.2519	551.333
conzattii	80	80c	1	1.44408	88.2573	9.71425	0.584338	19.4358	673
conzattii	80	80c	2	1.29611	90.4527	7.6637	0.587465	19.5128	668.833
conzattii	80	80c	3	1.33679	86.5556	11.5081	0.599488	19.2762	668.167
conzattii	60	60c	1	1.62984	89.0033	8.74402	0.622891	19.7049	660.833
conzattii	60	60c	2	1.60518	90.0902	7.72166	0.582976	19.7279	672
conzattii	60	60c	3	1.96725	91.1277	6.29254	0.612523	19.549	651.5
conzattii	40	40c	1	2.29977	91.2298	5.89723	0.57318	19.2527	639.5
conzattii	40	40c	2	2.05691	87.3584	9.96151	0.62319	19.7706	651.333
conzattii	40	40c	3	2.08979	91.521	5.84375	0.54547	19.5556	645.833
conzattii	20	20c	1	2.3493	87.5746	9.6264	0.449715	19.7654	685
conzattii	20	20c	2	2.25279	84.5669	12.3841	0.796199	19.8085	676
conzattii	20	20c	3	2.68115	88.0227	8.78303	0.513126	19.6845	689.167
